# Supplementary material
Source: PubMed Central journal article supplement (PMC6755901)
Supplement: NIHMS1047864-supplement-1.pdf [file NIHMS1047864-supplement-1.pdf]

**Supplemental Table 1.** Differences in alpha-diversity indicators by group and other demographic and clinical variables

| <b>Variable</b>                  | <b>Observed OTUs</b> |          | <b>Shannon Diversity Index</b> |                    | <b>Faith's Phylogenetic Diversity</b> |          |
|----------------------------------|----------------------|----------|--------------------------------|--------------------|---------------------------------------|----------|
|                                  | <i>H</i>             | <i>p</i> | <i>H</i>                       | <i>p</i>           | <i>H</i>                              | <i>p</i> |
| Diagnosis                        | 0.21                 | 0.648    | 0.03                           | 0.854              | 0.11                                  | 0.734    |
| Sex                              | 6.99                 | 0.008    | 6.28                           | 0.012              | 8.75                                  | 0.003    |
| Race                             | 4.75                 | 0.191    | 11.70                          | 0.008 <sup>a</sup> | 3.54                                  | 0.316    |
| BMI category                     | 1.86                 | 0.602    | 1.62                           | 0.655              | 0.95                                  | 0.813    |
| Smoking status                   | 2.16                 | 0.141    | 0.73                           | 0.391              | 2.69                                  | 0.101    |
| Current antipsychotic medication | 0.03                 | 0.866    | 0.11                           | 0.735              | 0.02                                  | 0.899    |

<sup>a</sup> Significant difference between Caucasians and African Americans and Caucasians and Hispanics  
OTU = operational taxonomic unit

**Supplemental Table 2.** Summary of differentially abundant taxa between groups.

[See attached Excel spreadsheet]
