# Supplementary material
Source: PubMed Central journal article supplement (PMC6755901)

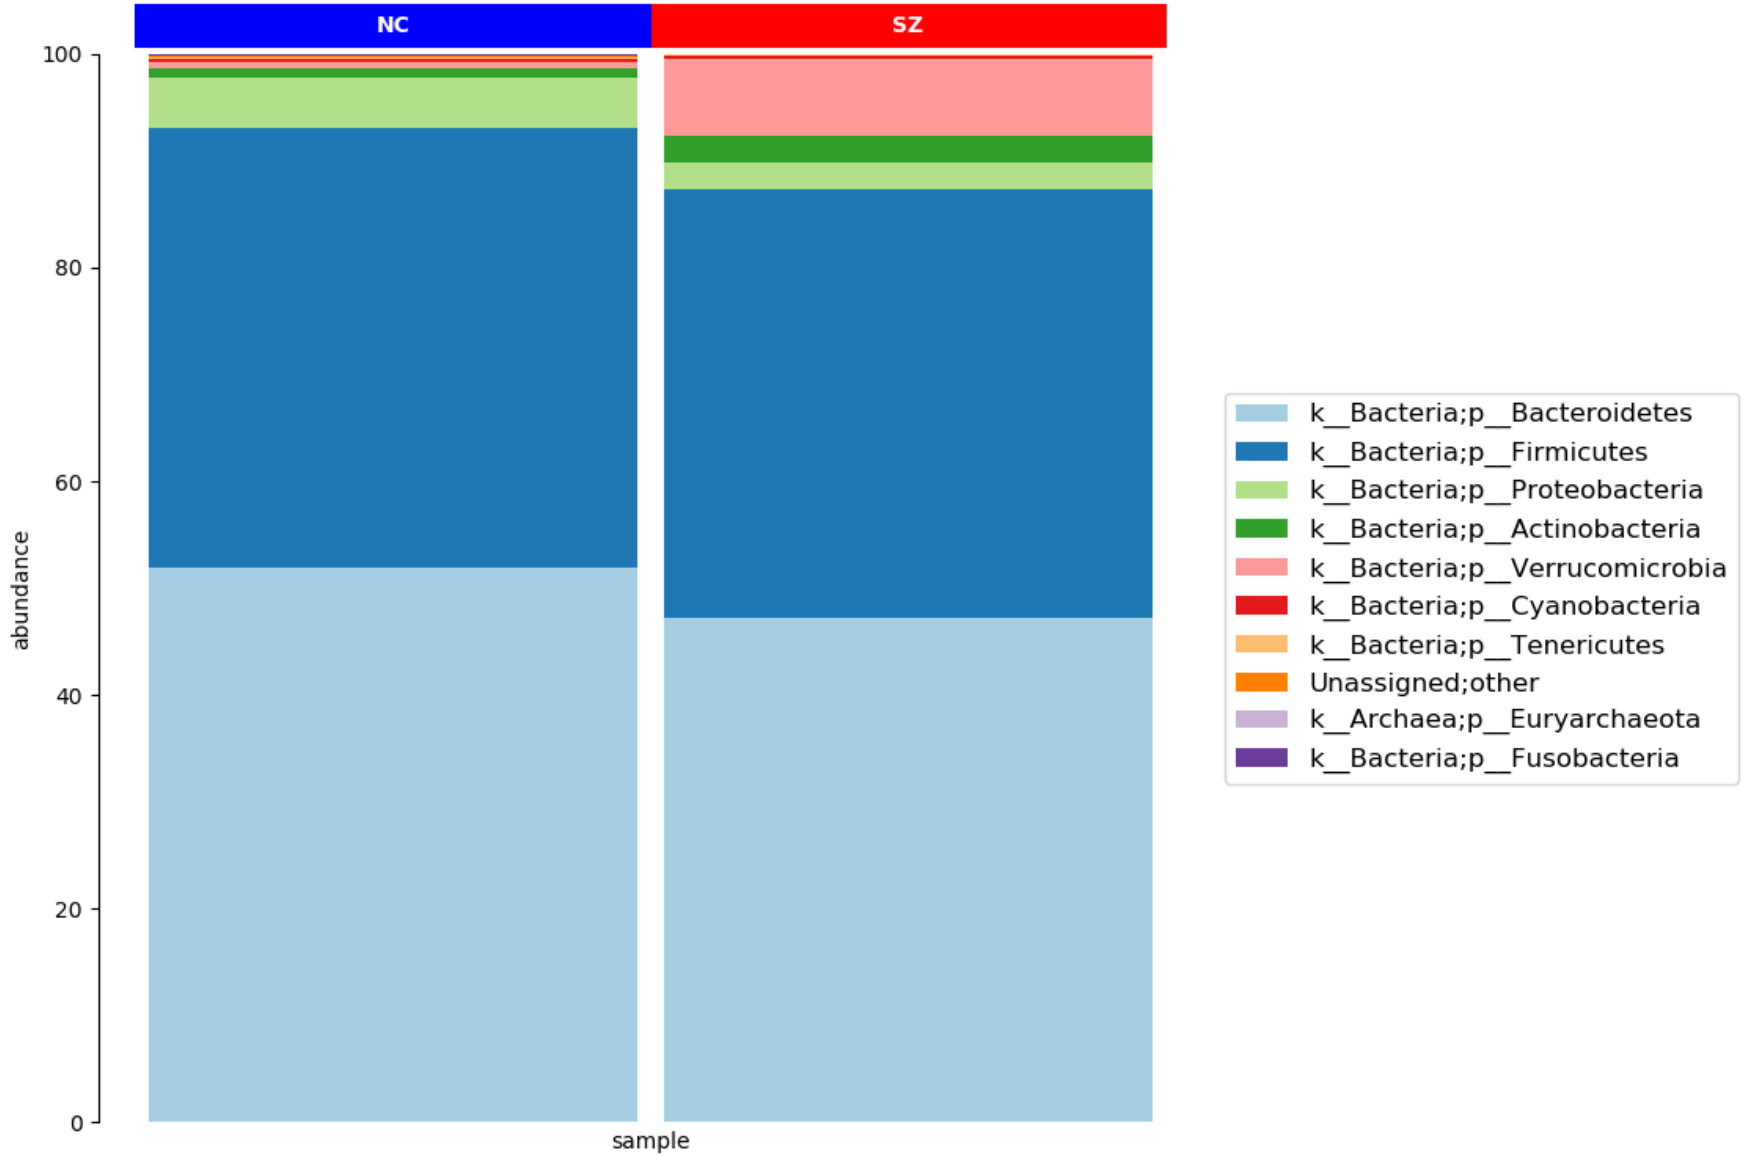

Supplement: NIHMS1047864-supplement-Supp_Figure_1.pdf [file NIHMS1047864-supplement-Supp_Figure_1.pdf]
